# Supplementary material for: LFA-1 Controls Th1 and Th17 Motility Behavior in the Inflamed Central Nervous System
Source: PubMed Central journal article supplement (PMC6813462; doi:10.3389/fimmu.2019.02436), 2019-10-18
Supplement: Table_1.pdf [file Table_1.pdf]

**Table I. Neuropathology of EAE mice treated intrathecally with the anti-LFA-1 blocking antibody.** Mice were euthanized 3 days after the first antibody injection (14 dpi) and during chronic phase (21 dpi). Spinal cords were analyzed for the presence of inflammatory infiltrates, demyelination and Iba-1<sup>+</sup> microglia. Results are expressed in mean  $\pm$  SEM of 4–6 cross sections of spinal cord per mouse. ( $n = 3$  mice per condition). Statistics were calculated using the Mann–Whitney test, with a confidence interval of 95%.

| Neuropathological feature |                   | 14 dpi           | 21 dpi           | <i>P</i> value |
|---------------------------|-------------------|------------------|------------------|----------------|
| <b>Infiltrates (%)</b>    | <b>CTRL</b>       | 12.08 $\pm$ 1.44 | 8.18 $\pm$ 1.17  | P=0.143        |
|                           | <b>Anti-LFA-1</b> | 8.05 $\pm$ 0.92  | 4.75 $\pm$ 1     | P=0.052        |
| <b>Demyelination (%)</b>  | <b>CTRL</b>       | 11.55 $\pm$ 1.45 | 2.58 $\pm$ 0.66  | ***P=0.0002    |
|                           | <b>Anti-LFA-1</b> | 2.71 $\pm$ 0.83  | 2.03 $\pm$ 0.26  | P=0.938        |
| <b>Iba-1 (%)</b>          | <b>CTRL</b>       | 14.07 $\pm$ 1.43 | 17.48 $\pm$ 1.60 | P=0.084        |
|                           | <b>Anti-LFA-1</b> | 5.18 $\pm$ 0.48  | 15.09 $\pm$ 1.27 | ****P<0.0001   |
